# Supplementary material
Source: publisher site journal article supplement (https://www.dovepress.com/article/565189)
Supplement: Supplementary file 1 [file Supplementary%20material.doc]

**The HIV epidemic in the United States – Epidemiological projections and public economic impact of achieving zero transmission goals**

**Supplemental Materials**

**Corresponding Author:**

Cillian Copeland

Global Market Access Solutions Sarl

Chardonne, Switzerland

cillian@gmasoln.com

**Supplementary Appendix S1 – Markov Model Inputs**

The assumed increase in parameters for the base case future scenario are described in Table 1 and Table 2 for the general population and the subgroup of men who have sex with men (MSM), respectively. These tables reflect the modeled changes from the base year of 2022 up to 2050, with 2050 values remaining constant for the remainder of the 50-year time horizon.

Table S1: Target policy values for future scenario (General population)

| **Parameter** | **Base Value** | **2030 Value** | **2040 Value** | **2050 Value** |
| --- | --- | --- | --- | --- |
| Annual probability of adopting PrEP for people eligible who are not already on PrEP | 0.0180% | 0.0189% | 0.0198% | 0.0198% |
| Proportion of patients diagnosed within 3 months of infection | 29.33% | 33.73% | 38.79% | 44.60% |
| Annual probability of screening (PWH and people without HIV) | 7.20% | 8.28% | 9.52% | 10.95% |
| Probability of starting treatment within 6 months of diagnosis | 86.58% | 100% | 100% | 100% |
| Probability of starting treatment within 3 months of diagnosis | 80.05% | 92.06% | 100% | 100% |
| Proportion of PWH on ART who are virally suppressed (TasP) | 90% | 90% | 90% | 90% |

***Abbreviations:*** *ART; Antiretroviral therapy; PrEP: Pre-exposure prophylaxis; PWH: People living with HIV; TasP: Treatment as prevention.*

Table S2: Target policy values for future scenario (MSM Subgroup)

| **Parameter** | **Base Value** | **2030 Value** | **2040 Value** | **2050 Value** |
| --- | --- | --- | --- | --- |
| Annual probability of adopting PrEP for people eligible who are not already on PrEP | 1.565% | 1.643% | 1.725% | 1.725% |
| Proportion of patients diagnosed within 3 months of infection | 29.33% | 33.73% | 38.79% | 44.60% |
| Annual probability of screening (PWH and people without HIV) | 38.30% | 44.05% | 50.65% | 58.25% |
| Probability of starting treatment within 6 months of diagnosis | 87.19% | 100% | 100% | 100% |
| Probability of starting treatment within 3 months of diagnosis | 81.51% | 93.73% | 100% | 100% |
| Proportion of PWH on ART who are virally suppressed (TasP) | 90% | 90% | 90% | 90% |

***Abbreviations:*** *ART; Antiretroviral therapy; PrEP: Pre-exposure prophylaxis; TasP: Treatment as prevention.*

Model inputs related to *human immunodeficiency virus* (HIV) epidemiology, population and healthcare costs are outlined in Table 3, Table 4, and Table 5, respectively.

Table S3: HIV epidemiology inputs

| Input | Value | Population | Additional information |
| --- | --- | --- | --- |
| Prevalence | | | |
| HIV prevalence | 0.370% | General population | Calculated using 2022 data from the CDC HIV surveillance reports1 |
| 17.475% | MSM |
| **Prevention** | | | |
| Proportion of people without HIV using PrEP | 0.153% | General population | Based on PrEP data published by AIDSVu2 |
| 13.410% | MSM |
| People without HIV discontinuing PrEP | 0.936% | General population, MSM | The 3-monthly rate of discontinuation from PrEP was calculated from the 5-year cumulative probability reported by the Greenwald et al. (17%)3. This Canadian study was considered broadly applicable to the US population. |
| PrEP efficacy in reducing HIV incidence | 86% | General population, MSM | Cambiano et al 20184 |
| Screening | | | |
| Proportion of patients tested at sexual health services (proxy for annual probability of screening) | 7.201% | General population | Patel et al 20205 |
| 38.3% | MSM | Spensley et al 20226 |
| Annual probability of being screened and diagnosed – patients with a CD4 count <200 | 100% | General population, MSM | It was assumed that individuals with a CD4 count <200 would become symptomatic and would be promptly identified. |
| Diagnosis | | | |
| Proportion of people with HIV who are undiagnosed | 12.779% | General population | CDC Surveillance Reports (2022 data)1 |
| 14.259% | MSM |
| Probability of diagnosis within 3 months of infection | 29.33% | General population, MSM | Fellows et al 20157 |
| Treatment | | | |
| ART infectiousness reduction | 100% | General population, MSM | Undetectable viral load was modelled not to lead to new HIV cases. |
| Probability of starting treatment within 3 months of diagnosis | 80.05% | General population | Bacon et al 20218 |
| 81.51% | MSM |
| Proportion of patients diagnosed and on treatment | 95.4% | General population | CDC 20229 |
| MSM |
| Probability of starting treatment within 6 months of diagnosis (>200 CD4 count) | 86.6% | General population | Public Health Agency of Canada 202210 |
| 87.2% | MSM |
| Probability of starting treatment within 6 months of diagnosis (<200 CD4 count) | 87.4% | General population | The proportion diagnosed and on ART10 was adjusted using the increased likelihood of starting ART within 6 months in people with CD4 <20011. The odds ratio was rearranged to a relative risk using a published equation12. |
| 88.0% | MSM |
| Proportion of patients with viral load ≤200 copies/mL | 90% | General population, MSM | Based on data from Ryan White HIV/AIDS program13 |
| CD4 cell count | | | |
| Proportion of untreated PWH with CD4≥500 | 23.8% | General population | Nanditha et al 202214 |
| 35.5% | MSM | Doyle et al 202215 |
| Proportion of untreated PWH with 500>CD4≥350 | 18.6% | General population | Nanditha et al 202214 |
| 26.4% | MSM | Doyle et al 202215 |
| Proportion of untreated PWH with 350>CD4≥200 | 21.8% | General population | Nanditha et al 202214 |
| 22.3% | MSM | Doyle et al 202215 |
| Proportion of untreated PWH with CD4 <200 | 35.9% | General population | Nanditha et al 202214 |
| 15.8% | MSM | Doyle et al 202215 |

***Abbreviations:*** *AIDS: acquired immunodeficiency syndrome; ART: antiretroviral therapy; CD4: cluster of differentiation 4; HIV: human immunodeficiency virus; MSM: men who have sex with men; PrEP; pre-exposure prophylaxis; PWH: People with HIV.*

Table S4: US population statistics and demographic inputs

| **Model input** | **Value** | **Additional information** |
| --- | --- | --- |
| Total US population | 334,914,895 | US Census Bureau16 |
| Proportion of males | 49.7% |
| Median age of the population without HIV infection at model start (years) | 40.8 |
| Median age of the PWH population at model start (years) | 45.5 | Enns et al 2019 17 |
| Total MSM population | 4,230,000 | Bennett et al 202418 |
| MSM as % of total US population | 1.26% | Calculated |
| **Population forecast** | | |
| Average population growth per year | 0.30% | US Census Bureau19 |
| Average increase in median age per year (general population) | 0.53% |
| Average increase in median age per year (PWH) | 0.578 | The difference in median age in 2010- and 2030 was divided by the number of years in this period20 |

***Abbreviations:*** *HIV: human immunodeficiency virus; MSM: men who have sex with men; PWH: people with HIV US: United States.*

Table S5: Healthcare cost inputs

| Input | Value* | Source |
| --- | --- | --- |
| Cost of one HIV test | $28.42 | Hutchinson et al 201621 |
| Cost of one CD4 count measurement | $28.42 |
| **Distribution of PrEP users across products (as a percentage of the population using PrEP)** | | |
| Generic | 56.52% | Data on file |
| Branded | 43.48% |
| **Unit cost (cost per dose) of PrEP products** | | |
| Emtricitabine & tenofovir (generic) | $70.07 | Average wholesale price as of August 2024 |
| Emtricitabine/tenofovir alafenamide | $2,642.76 |
| Units of PrEP used per user per month | 25.58 | Weighted average using the distribution of PrEP regimes reported by Sang 202222 and assuming 30 days on PrEP for those on a daily therapy and 15 days on PrEP for fluctuating between on-demand and daily PrEP. |
| Cost of monitoring activities for PrEP users | $496.91 | Shreshtha et al 202323 |
| **ART cost (per cycle)** | | |
| ART costs per patient | $9,723.42 | Cohen et al 202024 |
| **Cost of HIV-related clinical management for patients not on treatment (per cycle)** | | |
| Patients with CD4 ≥200 | $2,130.69 | Bingham et al 202125/Glaubius et al 202126 |
| Patients with CD4 <200 | $5,981.36 |
| **Cost of HIV-related clinical management for patients on treatment (per cycle)** | | |
| Patients with CD4 ≥200 | $2,130.69 | Bingham et al 202125/Glaubius et al 202126 |
| Patients with CD4 <200 | $5,981.36 |

***Abbreviations:*** *ART: antiretroviral therapy; CD4: cluster of differentiation 4; HIV: human immunodeficiency virus; MS:, men who have sex with men; PLWH: people living with HIV; PrEP: pre-exposure prophylaxis.*

***Notes:*** **Costs inflated where necessary using relevant US inflation indices27.*

**Supplementary Appendix S2 - Modeling fiscal consequences of HIV/AIDS in US**

***Targeted literature search***

A PubMed targeted literature search was conducted on the 21st of December 2022 to identify parameters linking HIV infection, CD4 count, and viral suppression to fiscal metrics such as the probability of employment, unemployment, disability, and early retirement. A single analyst was responsible for sifting title and abstracts, and selected publications deemed suitable for full inspection. A total of 51 publications were reviewed in full and subject to backwards reference checking. In addition, database search was supplemented by free-hand searches conducted on Google/Google Scholar. Data extraction involved 12 articles reporting some relative measure linking HIV infection to the fiscal/occupational outcomes of interest. The literature search strategy and extracted fiscal estimates can be found in Table 3 and Table 4, respectively.

Table S6: PubMed literature search strategy

| # | Category | Search terms |
| --- | --- | --- |
| 1 | Disease terms | (HIV[MeSH] OR HIV Infections[MeSH] OR Human Immunodeficiency Virus[TiAB] OR human immuno-deficiency virus[TiAB] OR HIV infect*[TiAB]) |
| 2 | Fiscal outcomes terms | (((((career mobility[MeSH] OR caregiver burden[MeSH] OR cost of illness[MeSH] OR family leave[MeSH] OR financial stress[MeSH] OR retirement[MeSH] OR return to work[MeSH] OR social security[MeSH] OR social welfare[MeSH] OR work[MeSH] OR employment[MeSH] OR unemployment[MeSH] OR back to work[tiab] OR workforce re-entry[tiab] OR returning to work[TiAB] OR job seeking[tiab] OR vocational counseling[tiab]) OR (activity impairment[TiAB] OR benefit payment[TiAB] OR compensation[TiAB] OR cost of illness[TiAB] OR disability allowance*[TiAB] OR earning*[TiAB] OR fiscal[TiAB] OR government transfer[TiAB] OR hidden cost*[TiAB] OR income[TiAB] OR indirect cost*[TiAB] OR indirect healthcare cost*[TiAB] OR living allowance*[TiAB] OR long-term disability[TiAB] OR lost time[TiAB] OR multifactor productivity[TiAB] OR pension*[TiAB] OR productive efficiency[TiAB] OR retire[TiAB] OR retirement[TiAB] OR salaries[TiAB] OR salary[TiAB] OR social benefit*[TiAB] OR social insurance benefit[TiAB] OR social security[TiAB] OR tax credit[TiAB] OR total factor productivity[TiAB] OR transfer payment[TiAB] OR transportation[TiAB] OR underemployment[TiAB] OR under-employment[TiAB] OR unemployment[TiAB] OR un-employment[TiAB] OR re-employment[TiAB] OR unemployed[TiAB] OR employability[TiAB] OR employable[TiAB] OR wage[TiAB] OR wages[TiAB] OR welfare[TiAB] OR WPAI[TiAB] OR work life[TiAB] OR workers compensation[TiAB] OR workers comp[TiAB])) OR ((work*[TiAB] OR job[TiAB] OR occupation*[TiAB] OR vocation*[TiAB] OR employ*[TiAB] OR workforce[TiAB] OR work-force[TiAB] OR labor force[TiAB] OR labour force[TiAB]) AND (loss[TiAB] OR productivity[TiAB] OR disability[TiAB] OR participation[TiAB] OR cessation[TiAB] OR status[TiAB] OR retention[TiAB] OR modification[TiAB] OR outcome[TiAB] OR impair*[TiAB] OR disrupt*[TiAB] OR incapacity[TiAB] OR incapability[TiAB] OR activity[TiAB] OR transportation[TiAB] OR leaving[TiAB]))) OR ((caregiver[TiAB]) AND (work*[TiAB] OR job[TiAB] OR occupation*[TiAB] OR vocation*[TiAB] OR employ*[TiAB] OR workforce[TiAB] OR work-force[TiAB] OR labor force[TiAB] OR labour force[TiAB]))) OR ((fewer[TiAB] OR loss[TiAB] OR lost[TiAB] OR unpaid[TiAB]) AND (work[TiAB]) AND (day[TiAB] OR hour*[TiAB]))) |
| 3 | 1 AND 2 | 22,340 |
| 4 | Health-related parameters impacting employment | (episod*[TiAB] OR increased symptoms[TiAB] OR disease progression[TiAB] OR increased viral load[TiAB] OR fatigue[TiAB] OR physical limitations[TiAB] OR cognitive impairment[TiAB] OR neuropsychological impairment[TiAB] OR comorbidity[TiAB] OR depression[TiAB] OR fear[TiAB] OR anxiety[TiAB] OR shame[TiAB] OR self-worth[TiAB]) |
| 5 | Treatment-related parameters impacting employment | ((HIV medication[TiAB] OR antiretroviral treatment[TiAB] OR ART[TiAB] or combination antiretroviral therapy[TiAB] OR cART[TiAB]) AND (adherence[TiAB] OR adverse events[TiAB] OR quality of life[TiAB] OR health-related quality of life[TiAB] OR HRQoL[TiAB] OR burden of treatment[TiAB] OR medical visits[TiAB] OR complicated regimen*[TiAB])) |
| 6 | 4 OR 5 | 1,777,693 |
| 7 | 3 AND 6 | 3,216 |
| 8 | 7 & 8 | Filters: Last 20 years (2003-2022): 2,807  AND studies on humans only: 2,592  AND studies on adults only: 1,797  AND English language publications only: 1,765 |

***Relative effect of HIV/AIDS on occupational outcomes***

Table S7: Published measures of the effect of HIV infection on fiscal and occupational outcomes

| **Outcome** | **Comparator** | **Metric** a | **Mean** | **95%CI**  **Lower** | **95%CI**  **Upper** | **Source** |
| --- | --- | --- | --- | --- | --- | --- |
| **Employment (reduction)** | | | | | | |
| HIV infection | GP vs PWH (RR) | RR | 0.840 | 0.830 | 0.860 | 28 |
| GP vs PWH (MD) | MD | -0.143 | -0.171 | -0.115 | 29 |
| GP vs PWH (MD) | MD | -0.147 | -0.184 | -0.109 | 30 |
| Viral suppression | VL > 50 copies/ml vs undetectable | RR | 0.775 | 0.725 | 0.833 | 28 |
| VL > 50 copies/ml vs undetectable | RR | 0.909 | 0.370 | 2.000 | 31 |
| AIDS (CD4<200) | CD4<200 vs CD4≥350 (RR) | RR | 0.926 | 0.877 | 0.971 | 28 |
| CD4<200 vs CD4>200 (RR) | RR | 0.730 | 0.467 | 1.136 | 31 |
| CD4<200 vs GP (MD) | MD | -0.576 | -0.768 | -0.432 | 32 |
| **Unemployment (increase)** | | | | | | |
| HIV infection | GP vs AIDS (RR) | RR | 1.620 | 1.340 | 1.960 | 33 |
| GP vs AIDS (RR) | RR | 1.396 | b | b | 34 |
| Viral suppression | Detectable VL vs undetectable | OR | 2.100 | 1.060 | 3.790 | 35 |
| VL <400/ml vs VL>400ml | OR | 1.520 | 1.110 | 2.070 | 36 |
| AIDS (CD4<200) | CD4 <50 vs CD4 >50 | OR | 1.410 | 1.140 | 1.740 | 37 |
| CD4<200 vs CD4>200 | OR | 1.820 | 0.940 | 3.580 | 35 |
| **Wages (decrease)** | | | | | | |
| HIV infection | PWH vs GP | MD | -0.080 | -0.089 | -0.072 | 36 |
| Viral suppression | PWH vs GP | MD | -0.080 | -0.089 | -0.072 | c |
| AIDS (CD4<200) | CD4<200 vs GP | MD | -0.134 | -0.183 | -0.098 | 36 |
| **Disability (increase)** | | | | | | |
| HIV infection | PWH vs GP | MD | -0.079 | -0.100 | -0.058 | 29 |
| Viral suppression | VL <400/ml vs VL≥400/ml | RR | 1.090 | 0.860 | 1.380 | 36 |
| VL >100,000 vs VS | OR | 1.587 | 1.205 | 2.128 | 38 |
| AIDS (CD4<200) | CD4<200 vs CD4≥500 | RR | 1.580 | 1.250 | 1.990 | 36 |
| CD4<350 vs CD4≥350 | OR | 2.710 | 1.250 | 5.870 | 39 |

***Abbreviations:*** *AIDS: Acquired immunodeficiency syndrome; CD4: cluster of differentiation 4; CI: confidence interval; GP: general population (unaffected by HIV); HIV: human immunodeficiency syndrome; MD: mean difference; OR: odds ratio; PWH: people living with HIV; RR: relative risk; VL: viral load.*

*a Mean differences were summed to the value of the reference category to derive the value in the category being compared. Before being multiplied by baseline rates, OR were rearranged to relative risks using a published equation12.*

*b Relative risk derived as the ratio of the probability of unemployment in people living with HIV over people in the general population (uninfected). The confidence intervals of the original inputs were used for one-way analysis of uncertainty.*

*c Assumed same as for HIV infection.*

**Supplementary Appendix S3 – Fiscal Model Inputs**

Table S8A: Fiscal inputs - Economic activity (2023)

|  | **16 to 24** | **25 to 34** | **35 to 44** | **45 to 54** | **55 to 64** | **65+** |
| --- | --- | --- | --- | --- | --- | --- |
| Employed Population* | 51.69% | 78.69% | 79.75% | 78.99% | 63.46% | 18.36% |
| Annual employment earnings** | $32,383 | $47,395 | $56,692 | $56,919 | $55,196 | $48,982 |
| Unemployed Population* | 4.39% | 3.22% | 2.32% | 2.03% | 1.65% | 0%*** |
| Unemployment benefits | $5,105 | $5,105 | $5,105 | $5,105 | $5,105 | $5,105 |

***Notes:*** **Inputs presented as percentage of total age band; **Wages were assumed to increase by 3.5% annually, reflecting historical long-term changes in nominal US wages; ***Assumed that individuals over 65 would not be in labor force unless employed.*

***Source:*** *OECD 40, Social Security data 41, US Bureau of Labor Statistics42,43, US Department of Labor, Employment and Training Administration 44.*

Table S8B: Fiscal inputs – Social Benefits (2023)

|  | **16 to 24** | **25 to 34** | **35 to 44** | **45 to 54** | **55 to 64** | **65+** |
| --- | --- | --- | --- | --- | --- | --- |
| % of disabled workers* | 0.05% | 0.08% | 0.12% | 0.31% | 0.68% | 0.00% |
| Disability benefits | $27,817 | $17,233 | $51,532 | $126,023 | $286,667 | $0 |
| % of retired workers* | 0.00% | 0.00% | 0.00% | 0.00% | 3.00% | 3.62% |
| Retired worker award | $0 | $0 | $0 | $0 | $1,269,720 | $2,145,999 |

***Notes:*** **Inputs presented as percentage of total age band.*

***Source:*** *Social Security Data41,45.*

**Supplementary Appendix S4 – Additional PSA Output**

For the PSA, model inputs were varied according to the following assumptions:

- Costs were sampled from a Gamma distribution.
- Probabilities were sampled from a Beta distribution.
- Sets of probabilities summing to one were sampled from a Dirichlet distribution.
- Epidemiologic estimates (prevalent and incident populations, PrEP users) were sampled from a Normal distribution.
- Rates were sampled from a Lognormal distribution.

Disaggregated incremental probabilistic results for the general population and MSM subgroup are provided in Table 9 and Table 10, respectively.

The distributions of results for the general population and MSM subgroup resulting from the PSA iterations were represented in whiskers plots depicted in Figure 1.

Table S9: Probabilistic disaggregated results (general population)

|  | **Incremental (Deterministic)** | **Incremental and 95% credible intervals (Probabilistic)** |
| --- | --- | --- |
| *Earnings from employment** | *$806 M* | *$768 M ($560 M to $1,010 M)* |
| Employment Insurance benefits | $4 M | $4 M ($3 M to $5 M) |
| Disability benefits (Pension Plan) | $3 M | $3 M ($2 M to $4 M) |
| Old age security | $0.53 K | -$0.57 K (-$0.89 K to -$0.31 K) |
| Direct taxes | $280 M | $267 M ($195 M to $352 M) |
| Indirect taxes | $22 M | $21 M ($16 M to $28 M) |
| Healthcare costs | $87 M | $71 M (-$45 M to $180 M) |
| **Incremental fiscal consequences** | **$397 M** | **$366 M ($213 M to $526 M)** |

Table S10: Probabilistic disaggregated results (MSM subgroup)

|  | **Incremental (Deterministic)** | **Incremental and 95% credible intervals (Probabilistic)** |
| --- | --- | --- |
| *Earnings from employment** | *$92 M* | *$85 M ($61 M to $113 M)* |
| Employment Insurance benefits | $0.54 M | $0.50 M ($0.34 M to $0.72 M) |
| Disability benefits (Pension Plan) | $0.37 M | $0.35 M ($0.23 M to $0.51 M) |
| Old age security | $0.20 K | -$0.19 K (-$0.40 K to -$0.08 K) |
| Direct taxes | $32 M | $30 M ($21 M to $39 M) |
| Indirect taxes | $3 M | $2 M ($2 M to $3 M) |
| Healthcare costs | $60 M | $58 M ($43 M to $81 M) |
| **Incremental fiscal consequences** | **$96 M** | **$91 M ($72 M to $120 M)** |

Figure S1: Distributions of PSA results

**
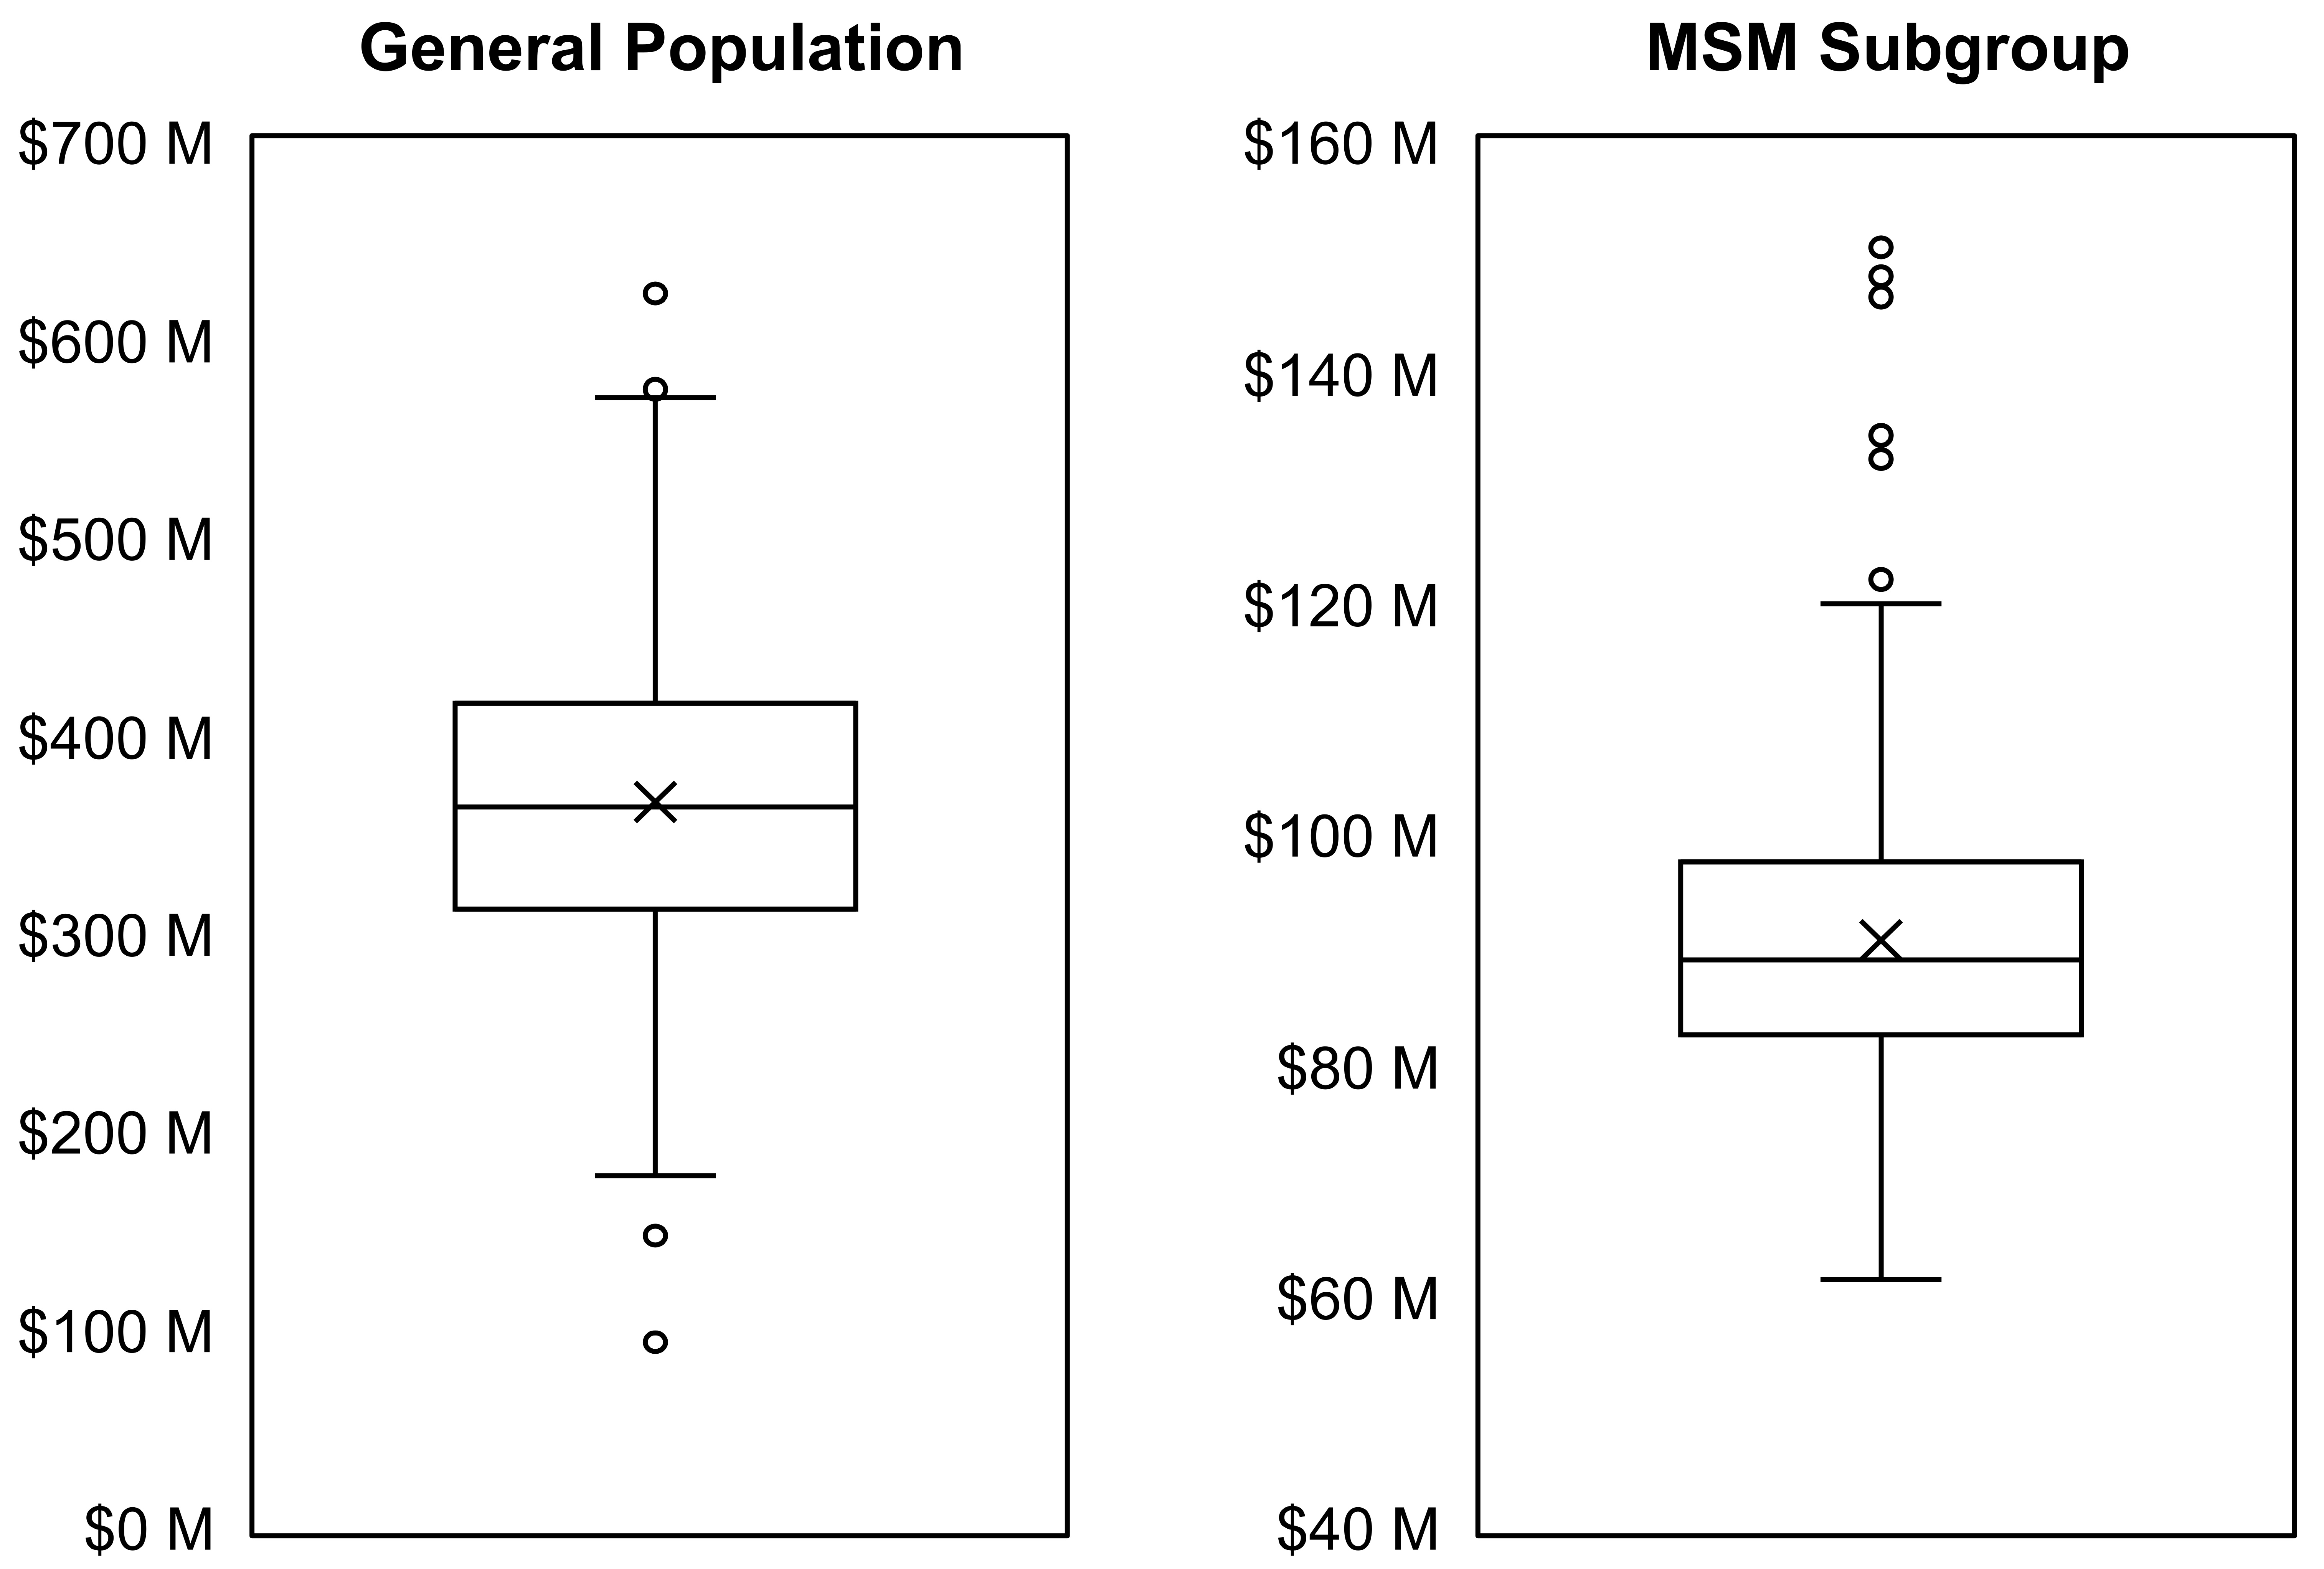
**

**References**

1. Centers for Disease Control and Prevention. *HIV Surveillance Supplemental Report: Estimated HIV Incidence and Prevalence in the United States, 2018–2022*. 2024. <https://stacks.cdc.gov/view/cdc/156513>

2. AIDSVu. Tools & Resources: National PrEP (Datasets). Accessed November, 2024. [https://aidsvu.org/resources/#/datasets](https://aidsvu.org/resources/)

3. Greenwald ZR, Maheu-Giroux M, Szabo J, et al. Cohort profile: l’Actuel pre-exposure prophylaxis (PrEP) cohort study in Montreal, Canada. *BMJ open*. 2019;9(6):e028768.

4. Cambiano V, Miners A, Dunn D, et al. Is Pre-Exposure Prophylaxis for HIV prevention cost-effective in men who have sex with men in the UK? A modelling and health economic evaluation. *The Lancet Infectious diseases*. 2018;18(1):85.

5. Patel D, Johnson CH, Krueger A, et al. Trends in HIV testing among US adults, aged 18–64 years, 2011–2017. *AIDS and behavior*. 2020;24:532-539.

6. Spensley CB, Plegue M, Seda R, Harper DM. Annual HIV screening rates for HIV-negative men who have sex with men in primary care. *PLoS One*. 2022;17(7):e0266747.

7. Fellows IE, Morris M, Birnbaum JK, et al. A new method for estimating the number of undiagnosed HIV infected based on HIV testing history, with an application to men who have sex with men in Seattle/King County, WA. *PloS one*. 2015;10(7):e0129551.

8. Bacon O, Chin J, Cohen SE, et al. Decreased time from human immunodeficiency virus diagnosis to care, antiretroviral therapy initiation, and virologic suppression during the citywide RAPID initiative in San Francisco. *Clinical Infectious Diseases*. 2021;73(1):e122-e128.

9. Centers for Disease Control and Prevention. *HIV Surveillance Special Report: Behavioral and Clinical Characteristics of Persons with Diagnosed HIV Infection Medical Monitoring Project, United States 2022 Cycle (June 2022–May 2023)*. 2024. <https://stacks.cdc.gov/view/cdc/159149>

10. Public Health Agency of Canada. *Estimates of HIV incidence, prevalence and Canada’s progress on meeting the 90-90-90 HIV targets, 2020*. 2022.

11. Mehraj V, Cox J, Lebouché B, et al. Socio‐economic status and time trends associated with early ART initiation following primary HIV infection in Montreal, Canada: 1996 to 2015. *Journal of the International AIDS Society*. 2018;21(2):e25034.

12. Gidwani R, Russell LB. Estimating transition probabilities from published evidence: a tutorial for decision modelers. *Pharmacoeconomics*. 2020;38(11):1153-1164.

13. Health Resources and Services Administration. *Ryan White HIV/AIDS Program Annual Data Report 2022*. 2023. <https://ryanwhite.hrsa.gov/sites/default/files/ryanwhite/data/rwhap-annual-client-level-data-report-2022.pdf>

14. Nanditha NGA, Dong X, Tafessu HM, et al. A province-wide HIV initiative to accelerate initiation of treatment-as-prevention and virologic suppression in British Columbia, Canada: a population-based cohort study. *Canadian Medical Association Open Access Journal*. 2022;10(1):E27-E34.

15. Doyle CM, Cox J, Milwid RM, et al. Measuring progress towards reaching zero new HIV acquisitions among key populations in Québec (Canada) using routine surveillance data: a mathematical modelling study. *African Journal of Reproduction and Gynaecological Endoscopy*. 2022;25(9):e25994.

16. United States Census Bureau. National Population by Characteristics: 2020-2023. Accessed August, 2024. <https://www.census.gov/data/tables/time-series/demo/popest/2020s-national-detail.html>

17. Enns B, Min JE, Panagiotoglou D, Montaner JS, Nosyk B, Bohdan SHAsgBRDPGRKPRMGDIHKHRSMJSN. Geographic variation in the costs of medical care for people living with HIV in British Columbia, Canada. *BMC health services research*. 2019;19(1):626.

18. Bennett BW, DuBose S, Huang Y-LA, et al. Population Percentage and Population Size of Men Who Have Sex With Men in the United States, 2017-2021: Meta-Analysis of 5 Population-Based Surveys. *JMIR Public Health and Surveillance*. 2024;10(1):e56643.

19. United States Census Bureau. 2023 National Population Projections Tables: Main Series. Accessed September, 2024. <https://www.census.gov/data/tables/2023/demo/popproj/2023-summary-tables.html>

20. Smit M, Cassidy R, Cozzi-Lepri A, et al. Projections of non-communicable disease and health care costs among HIV-positive persons in Italy and the USA: a modelling study. *PloS one*. 2017;12(10):e0186638.

21. Hutchinson AB, Farnham PG, Sansom SL, Yaylali E, Mermin JH. Cost-effectiveness of frequent HIV testing of high-risk populations in the United States. *JAIDS Journal of Acquired Immune Deficiency Syndromes*. 2016;71(3):323-330.

22. Sang JM, McAllister K, Wang L, et al. Examining provincial PrEP coverage and characterizing PrEP awareness and use among gay, bisexual and other men who have sex with men in Vancouver, Toronto and Montreal, 2017–2020. *Journal of the International AIDS Society*. 2022;25(10):e26017.

23. Shrestha RK, Davis N, Coleman M, Rusie LK, Smith DK. Costs of Providing Preexposure Prophylaxis for HIV Prevention at Community Health Centers in the United States. *Public Health Reports*. 2023;138(5):763-770.

24. Cohen JP, Beaubrun A, Ding Y, Wade RL, Hines DM. Estimation of the incremental cumulative cost of HIV compared with a non-HIV population. *PharmacoEconomics-Open*. 2020;4:687-696.

25. Bingham A, Shrestha RK, Khurana N, Jacobson EU, Farnham PG. Estimated lifetime HIV–related medical costs in the United States. *Sexually Transmitted Diseases*. 2021;48(4):299-304.

26. Glaubius R, Kothegal N, Birhanu S, et al. Disease progression and mortality with untreated HIV infection: Evidence synthesis of HIV seroconverter cohorts, antiretroviral treatment clinical cohorts and population‐based survey data. *Journal of the International AIDS Society*. 2021;24:e25784.

27. US Bureau of Labor Statistics. Consumer Price Index for All Urban Consumers (CPI-U). <https://data.bls.gov/dataViewer/view/timeseries/CUUR0000SAM>

28. Carlander C, Wagner P, Yilmaz A, Sparén P, Svedhem V. Employment by HIV status, mode of HIV transmission and migrant status: a nation-wide population-based study. *Aids*. 2021;35(1):115-123.

29. Legarth R, Omland LH, Kronborg G, et al. Employment status in persons with and without HIV infection in Denmark: 1996–2011. *Aids*. 2014;28(10):1489-1498.

30. Pena Longobardo LM, Oliva-Moreno J. Differences in labour participation between people living with HIV and the general population: Results from Spain along the business cycle. *PLoS One*. 2018;13(4):e0195735.

31. Dray-Spira R, Legeai C, Le Den M, et al. Burden of HIV disease and comorbidities on the chances of maintaining employment in the era of sustained combined antiretoviral therapies use. *Aids*. 2012;26(2):207-215.

32. García-Gómez P, Labeaga J, Oliva J. Employment and wages of people living with HIV/AIDS. 2012;

33. Annequin M, Lert F, Spire B, Dray-Spira R, Group A-VS. Increase in Unemployment over the 2000’s: Comparison between People Living with HIV and the French General Population. *PLoS One*. 2016;11(11):e0165634.

34. Groß M, Herr A, Hower M, Kuhlmann A, Mahlich J, Stoll M. Unemployment, health, and education of HIV-infected males in Germany. *International journal of public health*. 2016;61(5):593-602.

35. Ibrahim F, Anderson J, Bukutu C, Elford J. Social and economic hardship among people living with HIV in London. *HIV medicine*. 2008;9(8):616-624.

36. Annequin M, Lert F, Spire B, Dray-Spira R, Group VS. Has the employment status of people living with HIV changed since the early 2000s? *Aids*. 2015;29(12):1537-1547.

37. Joy R, Druyts EF, Brandson EK, et al. Impact of neighborhood-level socioeconomic status on HIV disease progression in a universal health care setting. *JAIDS Journal of Acquired Immune Deficiency Syndromes*. 2008;47(4):500-505.

38. Elzi L, Conen A, Patzen A, et al. Ability to Work and Employment Rates in Human Immunodeficiency Virus (HIV)-1-Infected Individuals Receiving Combination Antiretroviral Therapy: The Swiss HIV Cohort Study. *Open Forum Infect Dis*. Jan 2016;3(1):ofw022. doi:10.1093/ofid/ofw022

39. Brown DA, O’Brien KK, Harding R, et al. Prevalence, severity, and risk factors of disability among adults living with HIV accessing routine outpatient HIV care in London, United Kingdom (UK): A cross-sectional self-report study. *PLoS One*. 2022;17(5):e0267271.

40. OECD Data Explorer. Employment and unemployment by five-year age group and sex - levels. Accessed June, 2024. <https://www.oecd.org/en/data.html>

41. Social Security. *Annual Statistical Supplement, 2024*. 2024. <https://www.ssa.gov/policy/docs/statcomps/supplement/2024/index.html>

42. US Bureau of Labor Statistics. Labor Force Statistics from the Current Population Survey. Accessed June, 2024.

43. US Bureau of Labor Statistics. Employment Cost Index. Accessed March, 2025. <https://www.bls.gov/eci/>

44. United States Department of Labor EaTA. State Unemployment Insurance Program Data. Accessed September, 2024. <https://oui.doleta.gov/unemploy/claimssum/5159report.asp>

45. Social Security. *Annual Statistical Report on the Social Security Disability Insurance Program, 2022*. 2023. <https://www.ssa.gov/policy/docs/statcomps/di_asr/2022/>
